# Supplementary material for: The Role of Birds of the Family Corvidae in Transmitting Sarcocystis Protozoan Parasites
Source: MDPI journal article supplement (doi:10.3390/ani11113258), 2021-11-14
Supplement: s1 [file s1]

## Supplementary Material

Table S1. Species of *Sarcocystis* validated in various corvid birds using ITS1 or *cox1*

|              |         | IH=Aves            |                    |                   |                   |                   |                   |                     |                |                   |                    | IH=Carnivora      |                  | IH=Cervidae       |                      |                  |                     |
|--------------|---------|--------------------|--------------------|-------------------|-------------------|-------------------|-------------------|---------------------|----------------|-------------------|--------------------|-------------------|------------------|-------------------|----------------------|------------------|---------------------|
|              | Isolate | <i>S. calchasi</i> | <i>S. columbae</i> | <i>S. cornixi</i> | <i>S. corvusi</i> | <i>S. fulicae</i> | <i>S. halioti</i> | <i>S. kutkienae</i> | <i>S. lari</i> | <i>S. turdusi</i> | <i>S. wobeseri</i> | <i>S. arctica</i> | <i>S. lutrae</i> | <i>S. frondea</i> | <i>S. hardangeri</i> | <i>S. ovalis</i> | <i>S. oviformis</i> |
| Common raven | CcLT2   |                    |                    | OK481186          |                   |                   | OK481202          |                     |                |                   | OK481321           |                   |                  |                   |                      |                  |                     |
|              | CcLT3   |                    |                    |                   |                   |                   | OK481203          |                     | OK481295       |                   |                    | OK481372          |                  |                   |                      |                  |                     |
|              | CcLT4   |                    |                    |                   |                   |                   | OK481204          |                     |                | OK481308          | OK481322           |                   |                  |                   |                      |                  |                     |
|              | CcLT6   |                    |                    |                   |                   |                   |                   |                     |                |                   | OK481323           |                   |                  |                   |                      |                  |                     |
|              | CcLT10  |                    |                    |                   |                   |                   | OK481205          |                     |                |                   |                    | OK481373          |                  |                   |                      |                  | OK481379            |
|              | CcLT12  |                    | OK481182           |                   |                   |                   | OK481206          |                     | OK481296       |                   | OK481324           |                   |                  |                   |                      |                  | OK481380            |
|              | CcLT15  |                    |                    |                   |                   |                   | OK481207          | OK481250            |                |                   |                    |                   |                  |                   |                      |                  |                     |
|              | CcLT16  |                    |                    |                   |                   |                   | OK481208          |                     |                |                   |                    |                   |                  |                   |                      |                  |                     |
|              | CcLT17  |                    |                    |                   |                   |                   | OK481209          |                     |                |                   | OK481325           |                   | OK481377         |                   |                      |                  |                     |
|              | CcLT18  |                    |                    |                   |                   |                   |                   | OK481251            |                |                   | OK481326           |                   |                  |                   |                      |                  |                     |
|              | CcLT19  |                    |                    |                   |                   |                   | OK481210          | OK481252            |                |                   | OK481327           |                   |                  |                   |                      |                  |                     |
|              | CcLT20  |                    |                    |                   |                   |                   |                   | OK481253            | OK481297       |                   |                    |                   |                  |                   |                      |                  |                     |
|              | CcLT21  |                    |                    | OK481187          |                   |                   | OK481211          | OK481254            |                | OK481309          | OK481328           |                   |                  |                   |                      |                  |                     |
|              | CcLT22  |                    |                    | OK481188          |                   |                   | OK481212          |                     | OK481298       |                   | OK481329           |                   |                  |                   |                      |                  |                     |
|              | CcLT23  |                    | OK481183           |                   |                   |                   | OK481213          |                     |                |                   | OK481330           |                   |                  |                   |                      |                  |                     |
|              | CcLT24  |                    |                    | OK481189          |                   |                   |                   |                     |                |                   |                    |                   |                  |                   |                      |                  |                     |
|              | CcLT25  |                    |                    |                   |                   |                   | OK481214          |                     |                | OK481310          |                    |                   |                  |                   |                      |                  |                     |
|              | CcLT26  |                    |                    |                   |                   |                   | OK481215          | OK481255            |                |                   |                    |                   |                  |                   |                      |                  |                     |
|              | CcLT27  |                    |                    | OK481190          |                   |                   |                   |                     |                |                   |                    |                   |                  |                   |                      |                  |                     |
|              | CcLT28  |                    |                    |                   |                   |                   |                   | OK481256            |                |                   | OK481331           |                   |                  |                   |                      |                  |                     |
|              | CcLT29  |                    |                    |                   |                   |                   | OK481216          | OK481257            |                | OK481311          |                    |                   |                  |                   |                      |                  |                     |

|             |             |  |          |          |  |  |              |              |              |              |              |              |  |  |  |              |          |
|-------------|-------------|--|----------|----------|--|--|--------------|--------------|--------------|--------------|--------------|--------------|--|--|--|--------------|----------|
|             | CcLT30      |  |          |          |  |  |              | OK48125<br>8 |              |              |              |              |  |  |  |              | OK481381 |
|             | CcLT31      |  |          | OK481191 |  |  | OK48121<br>7 | OK48125<br>9 |              |              | OK48133<br>2 |              |  |  |  |              |          |
|             | CcLT32      |  |          |          |  |  | OK48121<br>8 | OK48126<br>0 |              |              |              |              |  |  |  |              |          |
|             | CcLT33      |  |          |          |  |  | OK48121<br>9 |              |              |              |              |              |  |  |  |              |          |
| Hooded crow | CcLT1v      |  |          |          |  |  | OK48122<br>0 | OK48126<br>1 |              |              | OK48133<br>3 | OK48137<br>4 |  |  |  |              |          |
|             | CcLT2v      |  |          | OK481192 |  |  | OK48122<br>1 | OK48126<br>2 |              |              | OK48133<br>4 |              |  |  |  |              |          |
|             | CcLT3v      |  |          | OK481193 |  |  | OK48122<br>2 |              |              | OK48131<br>2 | OK48133<br>5 | OK48137<br>5 |  |  |  |              |          |
|             | CcLT4v      |  |          |          |  |  |              |              |              |              | OK48133<br>6 |              |  |  |  |              |          |
|             | CcLT5v      |  |          |          |  |  | OK48122<br>3 | OK48126<br>3 |              |              | OK48133<br>7 |              |  |  |  |              |          |
|             | CcLT6v      |  |          |          |  |  |              | OK48126<br>4 |              |              | OK48133<br>8 |              |  |  |  |              |          |
|             | CcLT7v      |  |          |          |  |  | OK48122<br>4 | OK48126<br>5 |              |              | OK48133<br>9 | OK48137<br>6 |  |  |  |              |          |
|             | CcLT8v      |  |          |          |  |  |              | OK48126<br>6 |              |              | OK48134<br>0 |              |  |  |  |              |          |
|             | CcLT9v      |  |          |          |  |  | OK48122<br>5 | OK48126<br>7 |              |              | OK48134<br>1 |              |  |  |  |              |          |
|             | CcLT10<br>v |  |          |          |  |  |              |              |              |              |              |              |  |  |  |              |          |
|             | CcLT11<br>v |  |          |          |  |  | OK48122<br>6 | OK48126<br>8 |              |              | OK48134<br>2 |              |  |  |  |              |          |
|             | CcLT12<br>v |  |          |          |  |  |              | OK48126<br>9 |              |              | OK48134<br>3 |              |  |  |  |              |          |
|             | CcLT13<br>v |  |          |          |  |  | OK48122<br>7 | OK48127<br>0 |              |              | OK48134<br>4 |              |  |  |  |              |          |
|             | CcLT15<br>v |  | OK481184 |          |  |  | OK48122<br>8 | OK48127<br>1 | OK48129<br>9 |              | OK48134<br>5 |              |  |  |  | OK48137<br>8 | OK481382 |
|             | CcLT16<br>v |  |          |          |  |  | OK48122<br>9 | OK48127<br>2 |              | OK48131<br>3 | OK48134<br>6 |              |  |  |  |              |          |
|             | CcLT18<br>v |  | OK481185 |          |  |  | OK48123<br>0 | OK48127<br>3 | OK48130<br>0 |              | OK48134<br>7 |              |  |  |  |              |          |
|             | CcLT19<br>v |  |          |          |  |  | OK48123<br>1 |              |              |              | OK48134<br>8 |              |  |  |  |              |          |
|             | CcLT20<br>v |  |          |          |  |  | OK48123<br>2 | OK48127<br>4 |              |              | OK48134<br>9 |              |  |  |  |              |          |

[illegible]



Table S2. *Sarcocystis* species and GenBank accession numbers of sequences used in comparison analysis (Table 3). Sequences obtained in the present study are in boldface.

| Species               | GenBank acc. no.                                                                                               |
|-----------------------|----------------------------------------------------------------------------------------------------------------|
| <i>S. arctica</i>     | KF601306-KF601311, KX022108-KX022111, KX156837, KY947310-KY947311, MF596262-MF596282, <b>OK481372-OK481376</b> |
| <i>S. calchasi</i>    | FJ232948, KC733715-KC733718, KT945021-KT945022                                                                 |
| <i>S. canis</i>       | MW136927                                                                                                       |
| <i>S. columbae</i>    | GU253885, HM125052, MN450338-MN450339, <b>OK481182-OK481185</b>                                                |
| <i>S. cornixi</i>     | JF520781, JN256120, MZ707150, <b>OK481186-OK481201</b>                                                         |
| <i>S. corvusi</i>     | JN256119                                                                                                       |
| <i>S. felis</i>       | AY190082, MN508375-MN508379                                                                                    |
| <i>S. halioti</i>     | MF946589-MF946596, MH130209, MN450340-MN450356, MW929599-MW929600, MZ707148-MZ707149, <b>OK481202-OK481249</b> |
| <i>S. hardangeri</i>  | KC209625-KC209633                                                                                              |
| <i>S. jamaicensis</i> | KY994651                                                                                                       |
| <i>S. kutkienae</i>   | MT495389-MT495406, MZ707128-MZ707147, <b>OK481250-OK481294</b>                                                 |
| <i>S. lari</i>        | JQ733510, MF946597-MF946609, MN450357-MN450364, <b>OK481295-OK481307</b>                                       |
| <i>S. lutrae</i>      | KM657773-KM657805, MF596261, MG272296-MG272305, MG372108-MG372109, MT036253, <b>OK481377</b>                   |
| <i>S. ovalis</i>      | KC209644-KC209655, KF241355-KF241382, LC481034-LC481035, MF596210-MF596211, MK234168, <b>OK481378</b>          |
| <i>S. oviformis</i>   | KC209656-KC209661, KF898107-KF898109, MN339334-MN339338, MT242372, <b>OK481379-OK481382</b>                    |
| <i>S. turdusi</i>     | JF975683-JF975685, KJ540164-KJ540167, KT588510, <b>OK481308-OK481320</b>                                       |
| <i>S. wobeseri</i>    | GU475111-GU475112, HM159421, JN256121, MN450365-MN450373, <b>OK481321-OK481371</b>                             |
